# Supplementary material for: Crystallization induced realignment of carbon fibers in a phase change material to achieve exceptional thermal transportation properties
Source: Royal Society of Chemistry journal article supplement (doi:10.1039/d1ta09056a), 2021-11-26
Supplement: d1ta09056a4.pdf [file d1ta09056a4.pdf]

## Supporting Information

### Crystallization-induced Realignment of Carbon Fiber in Phase Change Material to Achieve Exceptional Thermal Transportation Properties

Maohua Li<sup>†,a,b,c</sup>, Linhong Li<sup>†,a,b</sup>, Yue Qin<sup>a</sup>, Xianzhe Wei<sup>a</sup>, Xiangdong Kong<sup>a</sup>, Zhenbang Zhang<sup>a</sup>, Shaoyang Xiong<sup>a</sup>,  
Hainam Do<sup>d</sup>, James C. Greer<sup>\*,c</sup>, Zhongbin Pan<sup>e</sup>, Tao Cai<sup>a</sup>, Wen Dai<sup>a</sup>, Cheng-Te Lin<sup>a,b</sup>, Nan Jiang<sup>\*,a,b</sup>, Jinhong  
Yu<sup>\*,a,b</sup>

*a. Key Laboratory of Marine Materials and Related Technologies, Zhejiang Key Laboratory of Marine Materials and Protective Technologies,*

*Ningbo Institute of Materials Technology and Engineering, Chinese Academy of Sciences, Ningbo 315201, China.*

*b. Center of Materials Science and Optoelectronics Engineering, University of Chinese Academy of Sciences, Beijing 100049, China.*

*c. University of Nottingham Ningbo New Materials Institute, Department of Electrical and Electronic Engineering, University of Nottingham*

*Ningbo China, 199 Taikang East Road, Ningbo, 315100, China.*

*d. Department of Chemical and Environmental Engineering, University of Nottingham Ningbo China, 199 Taikang East Road, Ningbo, 315100,*

*China.*

*e. School of Materials Science and Chemical Engineering, Ningbo University, Ningbo, 315211, China.*

*† Both authors are co-first authors and contributed equally to this work*

SUPPLEMENT

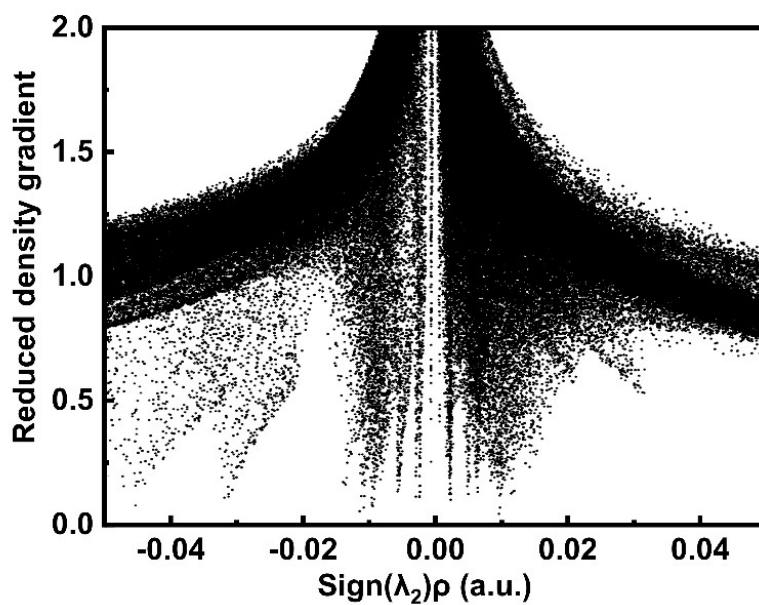

Figure S1. Plots of the reduced density gradient versus the electron density multiplied by the sign of the second Hessian eigenvalue.

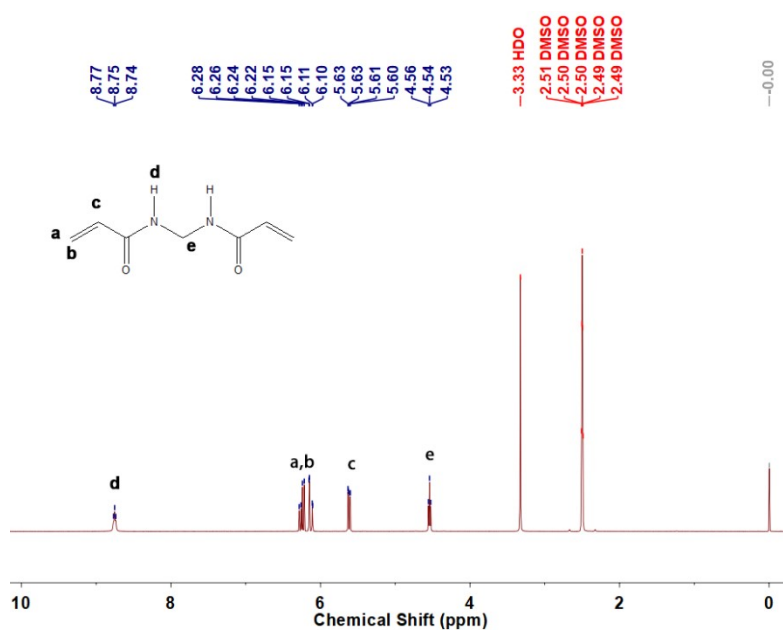

Figure S2. NMR spectrum of BAC

$^1\text{H}$  NMR (400 MHz,  $\text{DMSO}-d_6$ )  $\delta$  4.54(t,  $J=6.1$  Hz, 1H), 5.62(dd,  $J=10.0$ , 2.4 Hz, 1H), 6.13(dd,  $J=17.1$ , 2.4 Hz, 1H), 6.25(dd,  $J=17.1$ , 10 Hz, 1H), 8.75(t,  $J=6.0$  Hz, 1H).

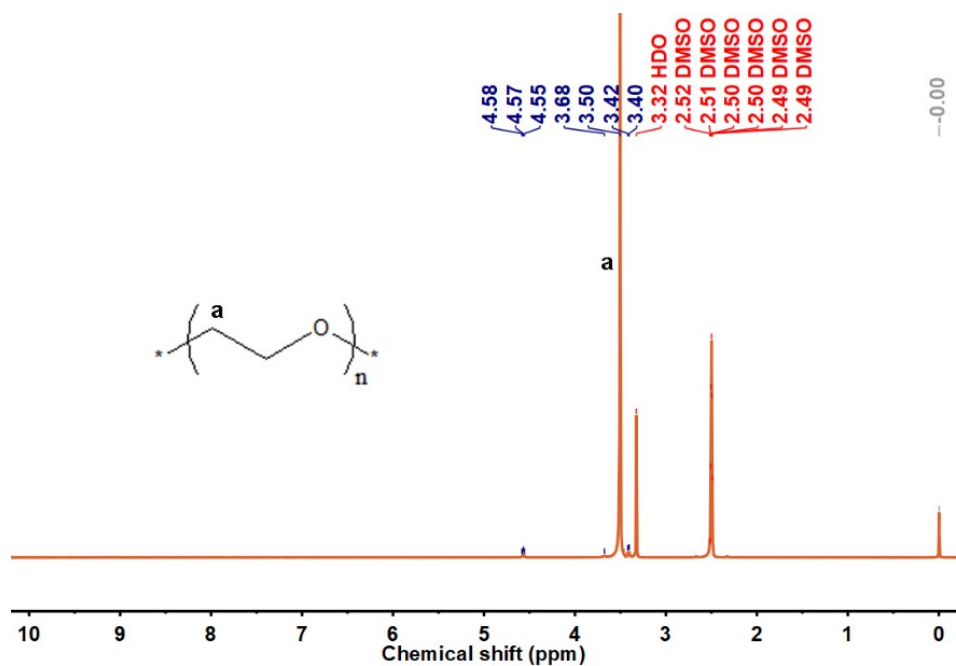

Figure S3. NMR spectrum of PEG

$^1\text{H}$  NMR (400 MHz,  $\text{DMSO-}d_6$ )  $\delta$  3.41(d,  $J=5.1$  Hz, 2H), 3.50(s, 115H), 3.68(s, 1H), 4.57(t,  $J=5.5$  Hz, 1H)

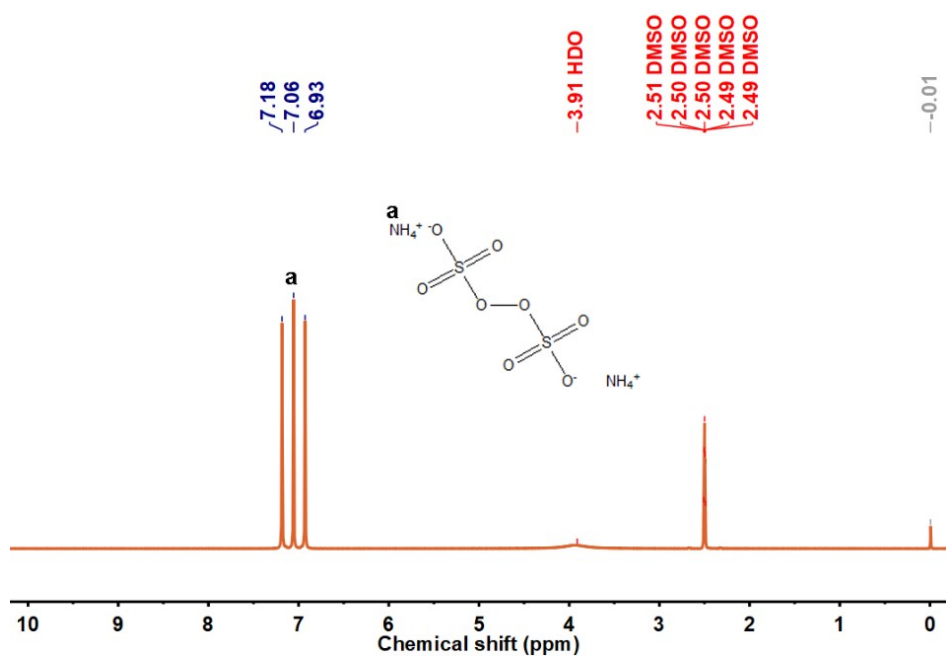

Figure S4. NMR spectrum of ammonium persulfate

$^1\text{H}$  NMR (400 MHz,  $\text{DMSO-}d_6$ )  $\delta$  7.06(t,  $J=52.0$  Hz)

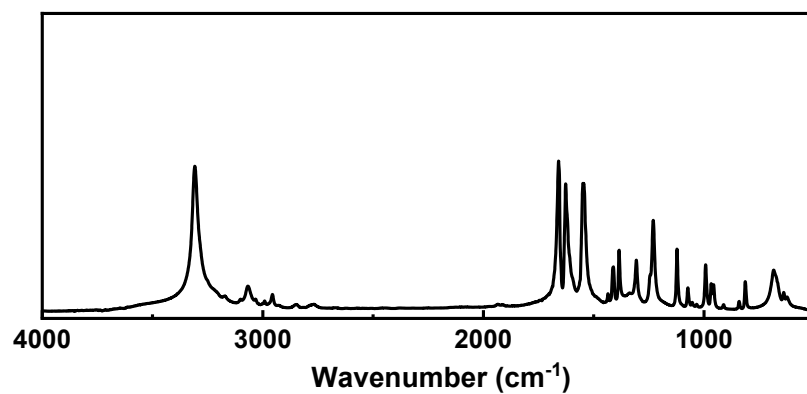

Figure S5. IR spectrum of BAC

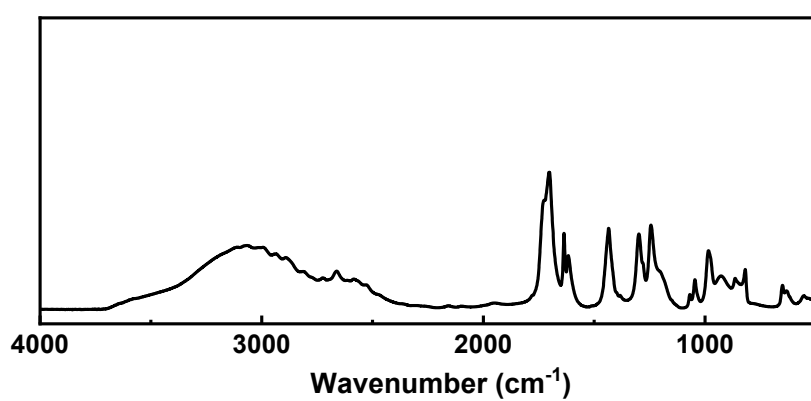

Figure S6. IR spectrum of acrylic acid

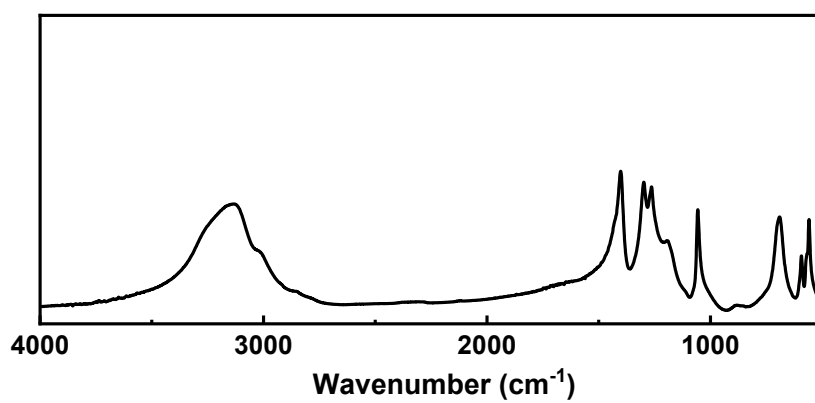

Figure S7. IR spectrum of ammonium persulfate

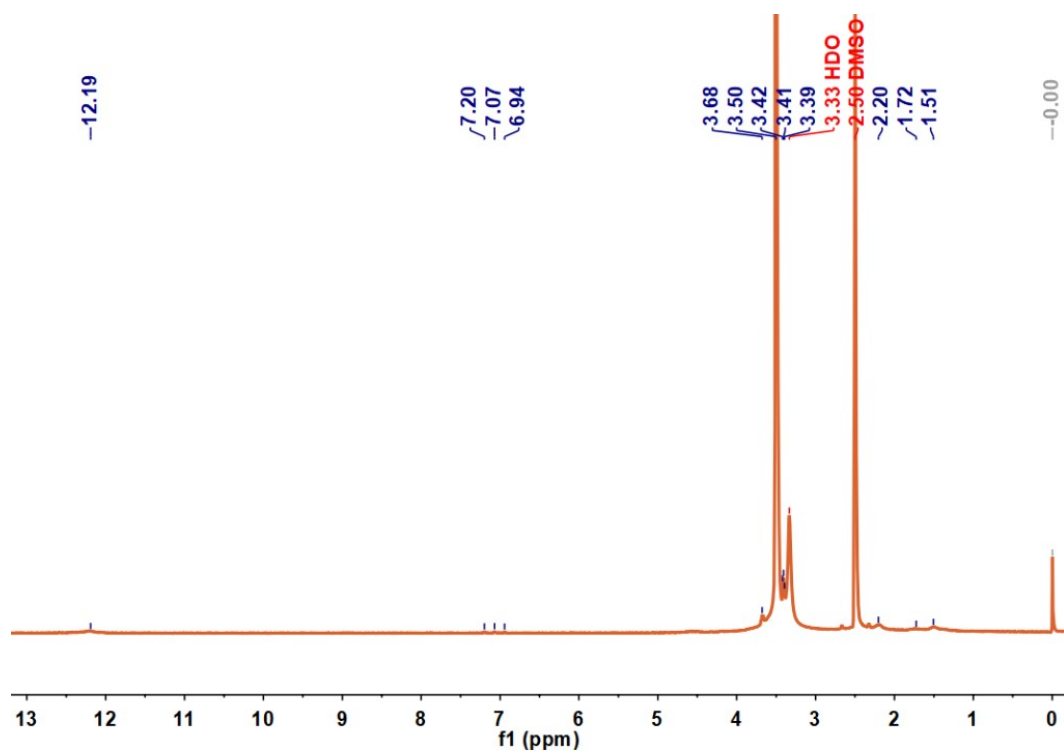

Figure S8. NMR spectrum of E10A2

<sup>1</sup>H NMR (400 MHz, DMSO-*d*<sub>6</sub>) δ 1.51(s), 1.72(s), 2.20(s), 3.41(t, J=5.0 Hz), 3.50(s), 3.68(s), 7.07 (t, J=51.3 Hz), 12.19(s)
